# Supplementary material for: Theta-Burst Stimulation for Cognitive Enhancement in Parkinson's Disease With Mild Cognitive Impairment: A Randomized, Double-Blind, Sham-Controlled Trial
Source: Front Neurol. 2020 Dec 21;11:584374. doi: 10.3389/fneur.2020.584374 (PMC7779796; doi:10.3389/fneur.2020.584374)
Supplement: Supplementary file 1 [file Table_1.docx]

**Theta-burst stimulation for cognitive enhancement in Parkinson’s disease with mild cognitive impairment: a randomized, double-blind, sham-controlled trial**

Stefan Lang MD1,2,4, Liu Shi Gan PhD1,4, Eun Jin Yoon PhD1, Alexandru Hanganu MD, PhD1,2,5,Mekale Kibreab BA1, Jenelle Cheetham BSc1, Tracy Hammer RN1, Iris Kathol PhD1,Justyna Sarna MD, PhD1,2, Davide Martino MD, PhD1,2,4, Oury Monchi PhD 1,2,3,4

1 Cumming School of Medicine, Hotchkiss Brain Institute, Calgary, AB, CA

2 Department of Clinical Neurosciences, University of Calgary, AB, CA

3 Department of Radiology, University of Calgary, Calgary, AB, CA

4 Non-invasive Neurostimulation Network, University of Calgary, AB, CA

5 Institut Universitaire de Gériatrie de Montréal, Centre de Recherche, Montreal, QC, CA

**Supplementary Table I. Reasons for exclusion**

**Reasons for Exclusion:**

40 Non-MCI

12 Age criteria

16 PD diagnostic criteria

09 Prior stroke

09 DBS

02 Psychiatric disorders

03 Dementia

20 Medical conditions

12 MRI exclusions

13 Personal reasons

33 Unknown
