# Supplementary material for: Theta-Burst Stimulation for Cognitive Enhancement in Parkinson's Disease With Mild Cognitive Impairment: A Randomized, Double-Blind, Sham-Controlled Trial
Source: Front Neurol. 2020 Dec 21;11:584374. doi: 10.3389/fneur.2020.584374 (PMC7779796; doi:10.3389/fneur.2020.584374)
Supplement: Supplementary file 2 [file Table_2.docx]

**Theta-burst stimulation for cognitive enhancement in Parkinson’s disease with mild cognitive impairment: a randomized, double-blind, sham-controlled trial**

Stefan Lang MD1,2,4, Liu Shi Gan PhD1,4, Eun Jin Yoon PhD1, Alexandru Hanganu MD, PhD1,2,5,Mekale Kibreab BA1, Jenelle Cheetham BSc1, Tracy Hammer RN1, Iris Kathol PhD1,Justyna Sarna MD, PhD1,2, Davide Martino MD, PhD1,2,4, Oury Monchi PhD 1,2,3,4

1 Cumming School of Medicine, Hotchkiss Brain Institute, Calgary, AB, CA

2 Department of Clinical Neurosciences, University of Calgary, AB, CA

3 Department of Radiology, University of Calgary, Calgary, AB, CA

4 Non-invasive Neurostimulation Network, University of Calgary, AB, CA

5 Institut Universitaire de Gériatrie de Montréal, Centre de Recherche, Montreal, QC, CA

**Supplementary Table 2:** **Neuropsychological Tests grouped into five cognitive domains**

| **Executive Function** |  |
| --- | --- |
|  | Stroop Color and Word Test* |
|  | Brixton Spatial Anticipation* |
|  | Hayling Sentence Completion Section 2 |
|  | Trail Making Test (B) |
|  | Clock Drawing Test (Command) |
| **Attention** |  |
|  | Trail Making Test (A) |
|  | WMS-IV Symbol Span* |
|  | WAIS-IV Digit Span (Forward) |
| **Language** |  |
|  | Boston Naming Test |
|  | Semantic Fluency (Animals/Actions)* |
| **Visuospatial** |  |
|  | Benton JOLO |
|  | RCFT copy trial |
| **Memory** |  |
|  | HVLT (Retention/Discrimination Index) |
|  | WMS-IV Logical Memory |
|  | RCFT delayed recall trial |

WMS = Wechsler Memory Scale; WAIS = Wechsler Adult Intelligence Scale; JOLO: Judgement of Line Orientation; RCFT: Rey Complex Figure Copy Test; HVLT: Hopkins Verbal Learning Test

*No alternative forms available. All other tests had alternative forms for each follow-up assessment.
