# Supplementary material for: Theta-Burst Stimulation for Cognitive Enhancement in Parkinson's Disease With Mild Cognitive Impairment: A Randomized, Double-Blind, Sham-Controlled Trial
Source: Front Neurol. 2020 Dec 21;11:584374. doi: 10.3389/fneur.2020.584374 (PMC7779796; doi:10.3389/fneur.2020.584374)
Supplement: Supplementary file 3 [file Table_3.docx]

**Theta-burst stimulation for cognitive enhancement in Parkinson’s disease with mild cognitive impairment: a randomized, double-blind, sham-controlled trial**

Stefan Lang MD1,2,4, Liu Shi Gan PhD1,4, Eun Jin Yoon PhD1, Alexandru Hanganu MD, PhD1,2,5,Mekale Kibreab BA1, Jenelle Cheetham BSc1, Tracy Hammer RN1, Iris Kathol PhD1,Justyna Sarna MD, PhD1,2, Davide Martino MD, PhD1,2,4, Oury Monchi PhD 1,2,3,4

1 Cumming School of Medicine, Hotchkiss Brain Institute, Calgary, AB, CA

2 Department of Clinical Neurosciences, University of Calgary, AB, CA

3 Department of Radiology, University of Calgary, Calgary, AB, CA

4 Non-invasive Neurostimulation Network, University of Calgary, AB, CA

5 Institut Universitaire de Gériatrie de Montréal, Centre de Recherche, Montreal, QC, CA

**Supplementary Table 3 - Adverse Events**

| **Relation to Study** | **Incident** | **Action Taken/Outcome** |
| --- | --- | --- |
| Definitely Related | Participant had uncomfortable sensation over left eye/forehead area during iTBS application. | Stimulation intensity was reduced by 3% at which point the uncomfortable sensation resolved. |
| Definitely Related | Participant had uncomfortable sensation over stimulation site area during iTBS application. | Stimulation intensity was reduced by 5% at which point the uncomfortable sensation resolved. |
| Definitely Related | Participant had uncomfortable sensation over stimulation site/left forehead area during iTBS application. | Stimulation intensity was reduced by 3% at which point the uncomfortable sensation resolved. |
| Definitely Related | Participant had uncomfortable sensation over stimulation site area during iTBS application. | Stimulation intensity was reduced by 5% at which point the uncomfortable sensation resolved. |
| Probably Related | Participant had uncomfortable sensation in tooth during iTBS application | Symptoms resolved spontaneously and stimulation continued as per protocol. |
| Possibly Related | Participant experienced discomfort (not painful) over left eye following iTBS application. This lasted for several days. | Participant remained in the study and continued as per protocol. Symptoms resolved spontaneously. |
| Possibly Related | Participant experienced minor headache following the first iTBS application. | Participant remained in the study and continued as per protocol. Symptoms resolved spontaneously. |
| No Relation | Participant had neurological event (Transient Ischemic Attack) while enrolled in the study, resulting in hospitalization. This did not occur during any of the laboratory visits. | Participant was discontinued from the study. |
